# Supplementary material for: Characterization of Spacesuit Associated Microbial Communities and Their Implications for NASA Missions
Source: Front Microbiol. 2021 Jul 29;12:608478. doi: 10.3389/fmicb.2021.608478 (PMC8358432; doi:10.3389/fmicb.2021.608478)
Supplement: Supplementary Table 2 — Bacterial abundances (in number of reads) from metagenomics for all samples. [file Table_2.xlsx]

## Sheet: STable_2_bact__2020_08_24
Supplementary Table 2. Shotgun metagenome sequences (Bacteria) of Spacesuit samples
	Acetoanaerobium_sticklandii	Acetobacter_aceti	Acetobacter_pasteurianus	Acetobacter_pomorum	Acetobacter_senegalensis	Acetobacter_sp_SLV-7	Acetobacter_tropicalis	Acholeplasma_brassicae	Acholeplasma_laidlawii	Acholeplasma_virus_L2	Achromobacter_denitrificans	Achromobacter_insolitus	Achromobacter_phage_phiAxp-3	Achromobacter_sp_AONIH1	Achromobacter_spanius	Achromobacter_virus_JWX	Achromobacter_xylosoxidans	Acidaminococcus_fermentans	Acidaminococcus_intestini	Acidiphilium_cryptum	Acidiphilium_multivorum	Acidipropionibacterium_acidipropionici	Acidithiobacillus_caldus	Acidothermus_cellulolyticus	Acidovorax_avenae	Acidovorax_citrulli	Acidovorax_ebreus	Acidovorax_sp_JS42	Acidovorax_sp_KKS102	Acidovorax_sp_NA2	Acidovorax_sp_NA3	Acidovorax_sp_P3	Acidovorax_sp_P4	Acidovorax_sp_RAC01	Acidovorax_sp_T1	Acinetobacter_baumannii	Acinetobacter_bereziniae	Acinetobacter_calcoaceticus	Acinetobacter_equi	Acinetobacter_haemolyticus	Acinetobacter_johnsonii	Acinetobacter_junii	Acinetobacter_lactucae	Acinetobacter_larvae	Acinetobacter_nosocomialis	Acinetobacter_oleivorans	Acinetobacter_phage_Ac42	Acinetobacter_phage_Acj61	Acinetobacter_phage_IME_AB3
SL280164								2			211			163			933		11		25	130					187	327	293	13	103			103	115	425	67			95	1533	1011	14		37
SL280165	17							13			64			78			565		23			120					222	376	182		32			96	69	719	86			103	1903	602			30
SL280166											62			181			1781					215					141	237	301		35		1	124	119	218	154			74	699	399
SL280167														113	24		456		4			37						13	57						14	197	31			15	278	83
SL280168											376	223		1175	295		1390					180	58		428	424	3383	3630	1231	196	187		1	1232	645	3094	637	112	141	485	4510	518	138	84	176	71
SL280169																	82					52					6	17								71	20			29	193	34			17
SL280170								8			55		1	73			711					164					34	64	155					58	63	422	109	33		215	1281	1704	14		95	25		1
SL280171								6			86	42		59			669					208	17			76	34	90	134	12				67	57	552	330			93	677	591	16		72	12
SL280172					11			12				44	3	84			669		6			592	13		91		75	109	244					104	80	7123	214	58		153	2553	801	41		169	43
SL280173											58	61		61	34		624					283					40	126	436	26	44			229	168	254	217			129	632	263	31		51	29
SL280174											67	48		118			626		14			245			77	89	126	218	269	23	35		1	123	170	1516	144	119	52	464	1456	1896	57		583	92			1
SL280175																	263		4			65					60	109	94					56	35	125				40	830	277
SL280176			53					8			249	72		199	102		886		27			265			153	111	409	620	384	26	128			170	144	1440	179	55	99	415	4323	1215	35		121	28
SL280177											463	270		144			2260										50	86	236		36				226	246	150			70	1179	246			38
SL280178		35						7			61			66			400		12			200			60	78	19	28	151		22			103	77	333	33			53	1874	129			38
SL280179	119							7			111	48		78	67		536		55			268			70	79	33	53	162		17			111	75	475	168	66	38	90	1717	323	176		66	41
SL280180												90		138			588		6			63					28	45	98					33		368	44			49	484	294			26	14
SL280181								2			124	32		98			493		23			107					117	198	175		55			78	72	508	132	27	33	192	1349	1032	23		57
SL280182	28							19			65			74			485		58			201			79	85	86	155	147	22	42			130	80	391	75	27	29	117	1908	649	15		42	17
SL280183											59			55			736					30					413	647	148		23			75	63	324	86			151	1776	984			23
SL280184											68	25		108			1332		28			318			129	149	58	116	248	27	10			139	119	1421	148	31		126	1819	623	26		24
SL280185								12			117	60		101	107		609		29		19	548	32	32	72	95	124	184	164	30	21			112	122	911	96	59	55	355	2826	1047	35		782	40
SL280186								11			369			255			1513		6			76			216	155	718	930	446	18	205			167	185	357	108			258	1886	1476			53
SL280187	49							46			56			82			743		24			164			81		233	379	254	25	67			84	79	477	106			200	5043	1241	12		51			1
SL280188											131			156			2199					109					137	253	513		16			223	128	743	188			218	5341	654			47
SL280189								13						39			252		20			182					12	20	48		6			39		1224				60	1095	225			23	9
SL280190								12			110	56		112	64		647		39			414			107	82	78	79	282	27	39			184	108	1338	464	84	106	327	2251	744	45		371	65		2
SL280191	144							11			182	87		156	128		1477		18	28	25	432			180	109	69	179	320	34	25			149	140	762	221	40	103	273	2310	1599	41		105
SL280192														115			2301										6		203						69	116	199				281	80
SL280193								8			68	70		122	65		828		18			358					20	80	138		20			59	77	450	310			121	911	360	27		70	19
SL280194								11			76	43			44		584		18			255			129	146	70	261	1700	125	130			953	593	386	147	40		302	758	660	29		111	19
SL280195								7			105	44		92			647					320	23	37	106	99	52	226	490	123	225		2	210	4561	1236	357	45	38	386	1800	2907	37		359	50	1
SL280196								13				31					261		5			120					13	33	113					45	40	200	31			61	881	392	8		23	13
SL280197			38					7			206			189			1319		20			209					222	435	430	14	132			127	184	557	125	40		190	2532	885			50
SL280198								8				37		59			591		4			213			106	74	25	68	299	21	25			171	97	428	72			79	1989	270			19
SL280199								9			48			58			467		27			417					27	71	123					36	45	611	41		34	72	1146	384			47
SL280200												79		101			218		6			460					26	43	71						57	335	34		13	59	378	227	13		37
SL280201								7			138			120			776		218			116					302	491	208	15	63			85	86	1408	147	31		188	2218	1649			75
SL280202	77							7			62			63			458		13			255			68		177	327	309	106	159	1		182	415	516	49		25	155	2003	638	14		49
SL280203								9				35		48			396		14			109					46	72	213		10			75	46	1623	37	15		78	1252	343			45
SL280204								13			94			48	80		366	11	26			199			67	55	30	59	157	24	18			80	76	415	62		26	108	1463	228	20		33
SL280205											102			164			1323					207			95	105	235	649	843	31	52			149	533	1941	102	45		333	1233	2736	32		225	20
SL280206								10									244		20			77					21	27	76					35	43	564	77			97	475	411			75	10
SL280207											427			326	91		2219		6			81	203		509	352	3822	6514	1892	124	573		7	1166	877	1836	261		42	1780	4246	18005			82
SL280208											137			108			1719					44			99	149	2542	4264	567	25	177		2	406	238	5075	228	64		576	3273	5403	54		184
SL280209								66			82			95			1347					69					71	222	230		31			93	83	5491	637	387	854	1005	11458	1287	270	267	1140	137
SL280210														91			751											66	142						52	592				168	7930	63			55
SL280211	10				29		33				83			66			454		6			217					105	200	163	30	29			86	208	821	209	50	54	268	1548	979	34		161	33	1	1
SL280212											75			75			1729		6								88	187	167		30				156	237	164			131	1928	262			31
SL280213											80			90			1712		11			319					95	156	187	21	25				75	342	127			72	1531	118
SL280214								2			106			59			1621					144					126	353	289		31			119	107	655	220		54	88	1788	188	84		54	19
SL280215								4			32			22			572					80					11	35	120					65	41	285	70			44	550	149
SL280216	17							71			123	170		122	77		1058			22		5831		33	170	144	78	171	340	32	45			188	174	17211	433	261	496	1678	14132	5064	105	236	491	97
SL280217											71			125			1505					76				134	61	140	222						166	564	196	25		188	1360	532			49
SL280218											127	60		181			2096					259	27				206	463	341	49	65			143	202	3493	201	85		904	1456	6179	113		761	28	3
SL280219											91			122	206		1929					210					163	290	269	25	22			101	145	1912	196	54		275	998	1025			149
SL280220											61			79			1095					178					21	36	90		11				50	779	110			250	600	413	29		72	23
SL280221								13			81	35		74	53		788		12			382			90		81	164	448	31	47			221	157	1114	234	99	41	308	1268	1755	66		703	85
SL280222												30		86			760					234				60	60	85	698		30			112	98	473	117			289	590	1327	32		66	31
SL280223											101			122			804					89				121	35	90	241					83	119	1316	71	72		142	1010	1386	75		332	65		2
SL280224														112			2065		9								439	734	201		44				66	348	194			109	910	323
SL280225											136			121			2420					57					51	108	251		46				88	389	221			92	6760	367			46
SL280226								18			104			521	56		2307					89					180	349	491		39			255	151	455	198			120	1704	121			60
SL280227								17			112	47		88			891					1605					55	97	175		33			64	67	7176	185	128	183	842	5879	3127	63	85	265	75
SL280228														119			885											8	121						16	229	85			24	314	88
SL280229											105			139			2085										165	331	209		19			81	54	380	127			77	2000	160			32
SL280230											88			95			2334		38								494	749	251		37				116	494	206			52	1004	152
SL280231											81			99			1806					36					45	115	142		12				39	111	190			26	499	97
SL280232											390			322			2733					141			541	517	129	529	4804	440	394		1	2898	1715	889	160			170	5343	278			59			10
SL280233								11			138			201			1155		21		29	788	58		134	124	312	626	475	71	85			274	813	2916	617	141	84	853	2185	6675	114	69	619	181
SL280234								11			1293	707		166			2496					174			315	229	131	266	308	38	52			196	473	723	307			266	3746	225			80
SL280235											103			107			1485					44					474	682	196		21				58	294	185			89	1185	165			37
SL280236											351	106		347			2202					142			315	261	147	345	2426	149	225			1039	539	510	172			133	3552	239			94
SL280237											108			159			2113					106					32	112	308					100	83	310	126			51	743	66
SL280238											98	55		157			1914					235					58	117	328		30			118	327	6288	254	201	68	317	2413	1985	96		1311	86		1
SL280239								24			106			138			1886					278					59	73	313		46				140	521	157			114	1188	444			49
SL280240					16		30	17			135			128	113		1720					241	32				125	235	421	47	38			186	205	1439	150	69	81	484	1713	2954	43		172	28
SL280241								40			194	100		188			2102					193			115	168	152	266	377	54	62			211	279	1219	250	39		347	1343	3711	36	33	405	7
SL280242								8			82	58		81			780					370			158	147	88	286	2097	149	174			1144	663	465	190	46		364	1089	844	37		80	13
SL280243								14			325	127		332	213		1612					255	45		410	376	274	461	691	113	179		4	445	1454	3617	764	2590	177	1299	1975	3799	266	75	1261	734	4
SL280244														194			711			187		80					95	217	244		16			99	108	756	95	46		161	695	1770	40		152	24
SL280245														358			1569		68				39				314	402	214		34				95	184	126			90	1617	254
SL280246								16						94			1385					32					30	95	971	81	93			602	342	284	110			37	1461	71
SL280247	160										199			262			2502		23			353	53		155	234	116	307	944	58	56			251	498	3909	294	132	97	1342	3195	6811	153		832	155
SL280248								5	85		109			143		1	884					111	32				104	184	208		20			91	76	4370	121	87		291	686	1691	50		326	49
SL280249				3							155			72			1947					47					785	1108	188		37			97	67	1103	198			132	3466	265			44
SL280250											95			58			1743		142			189					622	906	180		20				56	213	133			70	1113	255			31
SL280251											63			113			1439					73					302	781	303		48			120	74	1135	262	114	134	200	1757	299			53
SL280252						3					328	85		253	106		1515		11			327	25		177	137	190	408	462	76	102			250	1263	4409	443	221	251	961	3483	6271	155	107	1169	173	2
SL280253										1	153			213			1442			41		570			121	126	212	364	375	47	45			259	180	3216	203	63	162	586	1664	2799	71	60	324	72
SL280254								3			87			128			524		10			60					29	83	86					56	24	779	62	54		80	478	423	24		116	18
SL280255											58			109			1752		269								111	190	160		29				72	324	135			37	1429	421			46
SL280256											62			80			1786		14								52	131	160		46				51	186	165			47	917	170			32
SL280257											114			219			1683					61					200	258	196						49	154	163			51	1755	126
SL280258											48			52			1221											61	160					52	63	149	73			30	795	53
SL280259											145			161			1672					135					123	315	390	39	26			199	161	1966	152	62		228	839	2182	47		214	27
[truncated: 2,946 more columns]
