# Supplementary material for: Characterization of Spacesuit Associated Microbial Communities and Their Implications for NASA Missions
Source: Front Microbiol. 2021 Jul 29;12:608478. doi: 10.3389/fmicb.2021.608478 (PMC8358432; doi:10.3389/fmicb.2021.608478)
Supplement: Supplementary Table 4 — Percentage of reads assigned to different major groups. [file Table_4.xlsx]

## Sheet: Table 1
Supplementary Table 4. Metagenomic reads (percentage) associated with human (host), animal, and microbial species of the spacesuit samples. A: All reads included; B: Reads other than microbes are excluded.
Treatment	(A) Percent metagenomic reads associated with all of the following categories:
	Host	Unclassified	Animal	Bacteria	Archaea	Virus	Eukaryotes
PMA	26.5	41.1	1.8	30.2	0.2	0	0.2
No PMA	38.2	31.5	2.3	27.6	0.1	0.1	0.2
Treatment	(B) Percent metagenomic reads associated with the microbial categories:
	Bacteria	Archaea	Virus	Eukaryotes
PMA	98.6	0.51	0.11	0.81
No PMA	98.6	0.24	0.27	0.89
